# Supplementary material for: Genome-Wide Study of the ABI3 Gene Family and Identification of Putative miRNA Targeting ABI3 Gene in Oryza Sativa ssp. Indica
Source: Research Square preprint supplement (doi:10.21203/rs.3.rs-749254/v1), 2021-08-18
Supplement: Supplementary file 1 [file e68c2e92eef43460c40aee4e.docx]

| **S. No.**  **Supplementary Table 1: Description of ABI3 proteins of rice identified using Ensembl Plant DB** | **Gene ID** | **Domain** | **Chromosome** | **Location** | **base pair** | **Amino acid length** | **Uniprot ID** |
| --- | --- | --- | --- | --- | --- | --- | --- |
| **1** | **BGIOSGA014036** | **B3 DNA binding domain** | **4** | **34,467,404-34,469,735** | **1578** | **525** | **A2XZ93** |
| **2** | **BGIOSGA008106** | **B3 DNA binding domain** | **2** | **14,337,459-14,341,135** | **963** | **320** | **B8AGN3** |
| **3** | **BGIOSGA001046** | **B3 DNA binding domain** | **1** | **30,773,872-30,778,826** | **2145** | **714** | **B8A784** |
| **4** | **BGIOSGA024709** | **B3 DNA binding domain** | **7** | **4,293,374-4,296,488** | **2169** | **722** | **B8B7V5** |
| **5** | **BGIOSGA014093** | **B3 DNA binding domain** | **4** | **33,712,945-33,719,651** | **1593** | **530** | **A2XYY4** |
| **6** | **BGIOSGA000276** | **B3 DNA binding domain** | **1** | **43,437,820-43,441,228** | **2184** | **727** | **A2WY76** |
| **7** | **BGIOSGA014094** | **B3 DNA binding domain** | **4** | **33,708,246-33,712,158** | **1302** | **433** | **A2XYY3** |
| **8** | **BGIOSGA008149** | **B3 DNA binding domain** | **2** | **16,202,470-16,203,273** | **804** | **267** | **A2X4H1** |
| **9** | **BGIOSGA011738** | **B3 DNA binding domain** | **3** | **1,382,299-1,383,225** | **927** | **308** | **A2XBV3** |
| **10** | **BGIOSGA016767** | **B3 DNA binding domain** | **4** | **24,716,036-24,718,326** | **2100** | **699** | **B8AS27** |
| **11** | **BGIOSGA016768** | **B3 DNA binding domain** | **4** | **24,716,036-24,718,327** | **2101** | **699** | **Q01I35** |
| **12** | **BGIOSGA008657** | **B3 DNA binding domain** | **2** | **26,843,331-26,845,605** | **2046** | **681** | **B8AFR0** |
| **13** | **BGIOSGA033142** | **B3 DNA binding domain** | **10** | **16,882,299-16,886,827** | **2073** | **690** | **B8BHI0** |
| **14** | **BGIOSGA008150** | **B3 DNA binding domain** | **2** | **16,206,048-16,206,863** | **816** | **271** | **A2X4H2** |
| **15** | **BGIOSGA000982** | **B3 DNA binding domain** | **1** | **31,929,475-31,933,493** | **1086** | **361** | **A2WU11** |
| **16** | **BGIOSGA020682** | **B3 DNA binding domain** | **6** | **29,983,606-29,988,671** | **2754** | **917** | **A2YG67** |
| **17** | **BGIOSGA022089** | **B3 DNA binding domain** | **6** | **549,343-555,879** | **786** | **261** | **A2Y8E2** |
| **18** | **BGIOSGA008429** | **B3 DNA binding domain** | **2** | **22,770,291-22,775,002** | **2037** | **678** | **B8ADX3** |
| **18** | **BGIOSGA026655** | **B3 DNA binding domain** | **8** | **27,603,828-27,609,357** | **3096** | **1031** | **B8B8U2** |
| **19** | **BGIOSGA033901** | **B3 DNA binding domain** | **11** | **15,700,984-15,706,470** | **2562** | **853** | **A2ZET6** |
| **20** | **BGIOSGA036199** | **B3 DNA binding domain** | **12** | **13,958,730-13,964,610** | **2523** | **840** | **B8BPM5** |
| **21** | **BGIOSGA020315** | **B3 DNA binding domain** | **5** | **28,599,842-28,601,026** | **1185** | **394** | **A2Y761** |
| **22** | **BGIOSGA007604** | **B3 DNA binding domain** | **2** | **4,162,147-4,167,082** | **2727** | **908** | **A2X1A1** |
| **23** | **BGIOSGA014158** | **B3 DNA binding domain** | **4** | **32,977,789-32,982,550** | **2781** | **926** |  |
| **24** | **BGIOSGA035840** | **B3 DNA binding domain** | **12** | **21,626,023-21,630,818** | **2700** | **899** | **A2ZMP7** |
| **25** | **BGIOSGA005099** | **B3 DNA binding domain** | **1** | **44,551,929-44,556,180** | **2412** | **803** | **B8A8I4** |
| **26** | **BGIOSGA016467** | **B3 DNA binding domain** | **4** | **20,168,085-20,172,733** | **1983** | **660** | **B8AUB5** |
| **27** | **BGIOSGA023559** | **B3 DNA binding domain** | **6** | **31,509,080-31,516,398** | **3414** | **1137** | **B8B257** |
| **28** | **BGIOSGA023709** | **B3 DNA binding domain** | **7** | **26,872,232-26,878,599** | **2844** | **947** | **B8B628** |
| **29** | **BGIOSGA007153** | **B3 DNA binding domain** | **2** | **2,435,357-2,441,980** | **3204** | **1067** | **B8AHF1** |
| **30** | **BGIOSGA025947** | **B3 DNA binding domain** | **7** | **20,569,308-20,575,689** | **2409** | **802** | **B8B7G4** |
| **31** | **BGIOSGA022468** | **B3 DNA binding domain** | **6** | **5,544,029-5,549,711** | **3168** | **1055** | **A2Y5** |
| **32** | **BGIOSGA014119** | **B3 DNA binding domain** | **4** | **33,379,373-33,385,486** | **2502** | **833** | **B8ARE1** |
| **33** | **BGIOSGA003093** | **B3 DNA binding domain** | **1** | **8,174,038-8,178,433** | **2100** | **699** | **B8AB34** |
| **34** | **BGIOSGA002753** | **B3 DNA binding domain** | **1** | **2,662,716-2,663,814** | **1050** | **349** | **B8AD69** |
| **35** | **BGIOSGA002748** | **B3 DNA binding domain** | **1** | **2,602,979-2,604,088** | **1110** | **369** | **A2WKH7** |
| **36** | **BGIOSGA002747** | **B3 DNA binding domain** | **1** | **2,569,001-2,569,951** | **951** | **316** | **A2WKH5** |
| **37** | **BGIOSGA011927** | **B3 DNA binding domain** | **3** | **3,933,114-3,933,865** | **399** | **132** | **B8ANX3** |
| **38** | **BGIOSGA015306** | **B3 DNA binding domain** | **4** | **13,916,948-13,917,244** | **297** | **98** | **A2XS35** |
| **39** | **BGIOSGA013137** | **B3 DNA binding domain** | **3** | **27,253,308-27,254,056** | **336** | **111** | **B8AMK6** |
| **40** | **BGIOSGA025272** | **B3 DNA binding domain** | **7** | **4,297,136-4,298,584** | **1224** | **407** | **A2YIU3** |
| **41** | **BGIOSGA012100** | **B3 DNA binding domain** | **3** | **6,357,177-6,358,256** | **816** | **271** | **B8AQS1** |
| **42** | **BGIOSGA020831** | **B3 DNA binding domain** | **6** | **26,832,967-26,835,014** | **1029** | **342** | **A2YFB1** |
| **43** | **BGIOSGA022090** | **B3 DNA binding domain** | **6** | **544,115-544,726** | **612** | **203** | **A2Y8E1** |
| **44** | **BGIOSGA016160** | **B3 DNA binding domain** | **4** | **13,978,577-13,982,961** | **1305** | **434** | **B8ASH1** |
| **45** | **BGIOSGA013145** | **B3 DNA binding domain** | **3** | **27,393,633-27,395,724** | **1143** | **380** | **B8AML5** |
| **46** | **BGIOSGA011321** | **B3 DNA binding domain** | **3** | **4,835,617-4,837,251** | **714** | **237** | **A2XDA6** |
| **47** | **BGIOSGA006943** | **B3 DNA binding domain** | **2** | **6,354,238-6,355,351** | **870** | **289** | **A2X220** |
| **48** | **BGIOSGA027821** | **B3 DNA binding domain** | **8** | **71,961-76,236** | **1242** | **413** | **A2YQA9** |
| **49** | **BGIOSGA015201** | **B3 DNA binding domain** | **4** | **16,578,281-16,578,984** | **585** | **194** | **A2XSR4** |
| **50** | **BGIOSGA013142** | **B3 DNA binding domain** | **3** | **27,346,165-27,354,902** | **2532** | **843** | **B8AML1** |
| **51** | **BGIOSGA013143** | **B3 DNA binding domain** | **3** | **27,373,118-27,375,336** | **843** | **280** | **B8AML3** |
| **52** | **BGIOSGA027192** | **B3 DNA binding domain** | **8** | **15,282,265-15,284,803** | **1146** | **381** | **B8B9R0** |
| **53** | **BGIOSGA025273** | **B3 DNA binding domain** | **7** | **4,300,058-4,302,980** | **2391** | **796** | **B8B7V6** |
| **54** | **BGIOSGA022172** | **B3 DNA binding domain** | **6** | **776,881-778,374** | **531** | **176** | **A2Y8H3** |
| **55** | **BGIOSGA013132** | **B3 DNA binding domain** | **3** | **27,210,734-27,213,444** | **1533** | **510** | **B8AMK3** |
| **56** | **BGIOSGA013136** | **B3 DNA binding domain** | **3** | **27,246,007-27,248,907** | **1560** | **519** | **A2XJM2** |
| **57** | **BGIOSGA034469** | **B3 DNA binding domain** | **11** | **2,453,002-2,454,539** | **1092** | **363** | **B8BJ68** |
| **58** | **BGIOSGA013134** | **B3 DNA binding domain** | **3** | **27,226,336-27,228,260** | **1074** | **357** | **A2XJL9** |
| **59** | **BGIOSGA013133** | **B3 DNA binding domain** | **3** | **27,217,282-27,220,750** | **1611** | **536** | **A2XJL8** |
| **60** | **BGIOSGA013139** | **B3 DNA binding domain** | **3** | **27,292,041-27,295,503** | **1629** | **542** | **B8AMK8** |
| **61** | **BGIOSGA035909** | **B3 DNA binding domain** | **12** | **20,342,219-20,344,205** | **1101** | **366** | **A2ZM95** |
| **62** | **BGIOSGA013144** | **B3 DNA binding domain** | **3** | **27,389,397-27,391,249** | **1146** | **381** | **B8AML4** |
| **63** | **BGIOSGA015307** | **B3 DNA binding domain** | **4** | **13,911,676-13,915,452** | **1374** | **457** | **B8ASH0** |
| **64** | **BGIOSGA037705** | **B3 DNA binding domain** | **12** | **20,286,251-20,291,374** | **2232** | **743** | **B8BMS8** |
| **65** | **BGIOSGA037706** | **B3 DNA binding domain** | **12** | **20,293,640-20,295,871** | **1416** | **471** | **B8BMS9** |
| **66** | **BGIOSGA027187** | **B3 DNA binding domain** | **8** | **15,377,649-15,380,785** | **1272** | **423** | **B8B9R5** |
| **67** | **BGIOSGA017853** | **B3 DNA binding domain** | **5** | **25,101,422-25,105,121** | **840** | **279** | **B8AZB1** |
| **68** | **BGIOSGA000812** | **B3 DNA binding domain** | **1** | **34,821,449-34,826,440** | **2025** | **674** | **B8A9U3** |
| **69** | **BGIOSGA004373** | **B3 DNA binding domain** | **1** | **33,400,672-33,406,534** | **1206** | **401** | **B8A925** |
| **70** | **BGIOSGA004375** | **B3 DNA binding domain** | **1** | **33,414,024-33,416,810** | **2112** | **703** | **A2WUM3** |
| **71** | **BGIOSGA036599** | **B3 DNA binding domain** | **12** | **3,066,302-3,067,431** | **822** | **273** | **B8BNA0** |
| **72** | **BGIOSGA031489** | **B3 DNA binding domain** | **10** | **19,905,090-19,906,028** | **9393** | **312** | **A2Z9R3** |
| **73** | **BGIOSGA014498** | **B3 DNA binding domain** | **4** | **28,151,772-28,152,974** | **1203** | **400** | **A2XWR8** |
| **74** | **BGIOSGA034352** | **B3 DNA binding domain** | **11** | **4,658,859-4,663,468** | **1269** | **422** | **B8BJK1** |
| **75** | **BGIOSGA005835** | **B3 DNA binding domain** | **2** | **29,743,731-29,744,966** | **1236** | **411** | **A2X8D1** |
| **76** | **BGIOSGA020357** | **B3 DNA binding domain** | **5** | **29,310,564-29,315,271** | **2139** | **712** | **B8AWQ8** |
| **77** | **BGIOSGA037707** | **B3 DNA binding domain** | **12** | **20,306,553-20,308,232** | **1065** | **354** | **A2ZM93** |
| **78** | **BGIOSGA000302** | **B3 DNA binding domain** | **1** | **43,104,220-43,107,536** | **2022** | **673** | **A2WY33** |
| **79** | **BGIOSGA022464** | **B3 DNA binding domain** | **6** | **5,339,497-5,341,004** | **693** | **230** | **A2YA88** |
| **80** | **BGIOSGA003083** | **B3 DNA binding domain** | **1** | **8,053,059-8,057,645** | **1488** | **495** | **B8AB21** |
| **81** | **BGIOSGA006113** | **B3 DNA binding domain** | **2** | **25,019,185-25,024,670** | **2919** | **972** | **B8AF31** |
| **82** | **BGIOSGA028020** | **B3 DNA binding domain** | **8** | **3,653,044-3,653,904** | **861** | **286** | **A2YRE5** |
| **83** | **BGIOSGA025276** | **B3 DNA binding domain** | **7** | **4,324,706-4,326,331** | **1626** | **541** | **A2YIU7** |
